# Supplementary material for: Cenozoic Tethyan changes dominated Eurasian animal evolution and diversity patterns
Source: PubMed Central journal article supplement — Zool Res. 2022 Jan 18;43(1):3–13. doi: 10.24272/j.issn.2095-8137.2021.322 (PMC8743248; doi:10.24272/j.issn.2095-8137.2021.322), 2022-01-18
Supplement: zr-43-1-3-S1.pdf [file zr-43-1-3-S1.pdf]

Supplementary Table S1. The summary impacts of the Cenozoic Tethyan geological events on Eurasian animal evolution.

| Major geological events                                                                             | Changes in/between habitats                        | Impacts on                                                 |                                                            |                                              |
|-----------------------------------------------------------------------------------------------------|----------------------------------------------------|------------------------------------------------------------|------------------------------------------------------------|----------------------------------------------|
|                                                                                                     |                                                    | terrestrial fauna                                          | freshwater fauna                                           | marine fauna                                 |
| <b>Convergence of plates</b><br>northward movement of African-Arabian, Indian and Australian plates | narrowing of sea / land bridge                     | Exchange / dispersal / migration                           |                                                            | divergence                                   |
| <b>Continent-continent collision</b><br>Indian-Asia / Australia-Southeast Asia / Arab-Eurasia       | continental connection / closure of seaway         | exchange / dispersal / migration                           | exchange / dispersal / divergence / vicariance             | vicariance                                   |
|                                                                                                     | cohesive zone shift from shallow sea to freshwater |                                                            |                                                            | adaptation / habitat shift                   |
|                                                                                                     | archipelago / shallow seas                         | dispersal / vicariant / diversification                    |                                                            | evolution / speciation / diversification     |
|                                                                                                     | anchialine caves                                   |                                                            |                                                            | adaption / isolation / relict                |
| <b>Sea-level changes</b><br>in Southeast Asian and Europe                                           | rise / transgression / waterway / seaway           | vicariance                                                 | expansion / dispersal                                      | expansion / exchange / dispersal / migration |
|                                                                                                     | decline / regression / terrestrial corridor        | expansion / exchange / dispersal / migration / reunion     | isolation                                                  | vicariance                                   |
|                                                                                                     | fluctuation / ups and downs                        | diversification                                            | diversification                                            | speciation / diversification                 |
| <b>Formation of Alpine-Himalayan orogenic belt</b>                                                  | orogenesis                                         | speciation / endemism / diversification                    | speciation / endemism / diversification                    |                                              |
|                                                                                                     | terrestrial barriers                               | divergence / vicariance                                    | divergence / vicariance                                    |                                              |
|                                                                                                     | glacial refugia                                    | preservation / expansion                                   | preservation / expansion                                   |                                              |
|                                                                                                     | high plateau environment                           | extinction / adaptation                                    | extinction / adaptation                                    |                                              |
|                                                                                                     | karst cave environment                             | adaption / convergence / isolation / endemism / speciation | adaption / convergence / isolation / endemism / speciation |                                              |
| <b>Regression of the Paratethys Sea</b>                                                             | Eurasian migration corridor                        | exchange / dispersal / migration                           |                                                            |                                              |
|                                                                                                     | disappeared marine environment                     |                                                            |                                                            | extinction / relict distributions            |
|                                                                                                     | brackish / freshwater ecosystems                   |                                                            | expansion / dispersal / origin / rapid diversification     | adaption / rapid diversification             |
| <b>Aridification of Central Asia</b>                                                                | increasing aridification                           | disjunct distribution / divergence                         | disjunct distribution                                      |                                              |
|                                                                                                     | open and dry habitats                              | adaptation / expansion / radiation                         |                                                            |                                              |
| <b>Messinian salinity</b>                                                                           | Sea-level decline / land connections               | expansion / exchange / isolation / reunion                 | expansion / exchange / reunion / isolation                 |                                              |
|                                                                                                     | disappeared marine environment                     |                                                            | exchange / dispersal / migration                           | extinction                                   |
|                                                                                                     | hyposaline lake                                    |                                                            |                                                            | adaption                                     |
| <b>Zanclean flood</b>                                                                               | reopened seaway                                    |                                                            | isolation / endemism                                       | exchange / dispersal / migration             |
|                                                                                                     | restore marine environment                         |                                                            | readaptation                                               |                                              |
